# Supplementary material for: The real-time in vivo electrochemical measurement of nitric oxide and carbon monoxide release upon direct epidural electrical stimulation of the rat neocortex
Source: Royal Society of Chemistry journal article supplement (doi:10.1039/c5an00122f), 2015-01-01
Supplement: c5an00122f1.pdf [file c5an00122f1.pdf]

**Supplementary Data for**

**The real-time *in vivo* electrochemical measurement of nitric oxide and carbon monoxide release upon direct epidural electrical stimulation of the rat neocortex**

Sarah S. Park,<sup>a</sup> Minyoung Hong,<sup>b</sup> Yejin Ha,<sup>a</sup> Jeongeun Sim,<sup>b,c</sup> Gil-Ja Jhon,<sup>a</sup> Youngmi Lee,<sup>a,\*</sup>

Minah Suh<sup>b,c, d, e,\*</sup>

<sup>a</sup>*Department of Chemistry and Nano Science, Ewha Womans University, Seoul, 120-750, Republic of Korea. Fax: +82-2-3277-2384, E-mail: youngmilee@ewha.ac.kr*

<sup>b</sup>*Department of Biological Science, Sungkyunkwan University, Suwon, 440-746, Republic of Korea. E-mail: minahsuh@skku.edu*

<sup>c</sup>*Center for Neuroscience Research Imaging (CNIR), Institute for Basic Science (IBS), Suwon 440-746, Republic of Korea*

<sup>d</sup>*Department of Biomedical Engineering, Sungkyunkwan University, Suwon, 440-746, Republic of Korea*

<sup>e</sup>*Samsung Advanced Institute of Health Science and Technology (SAIHST), Sungkyunkwan University, Suwon, 440-746, Republic of Korea*

\*Co-corresponding authors: (Fax) +82-2-3277-2384, (E-mail) youngmilee@ewha.ac.kr (Y. Lee) and minahsuh@skku.edu (M. Suh).

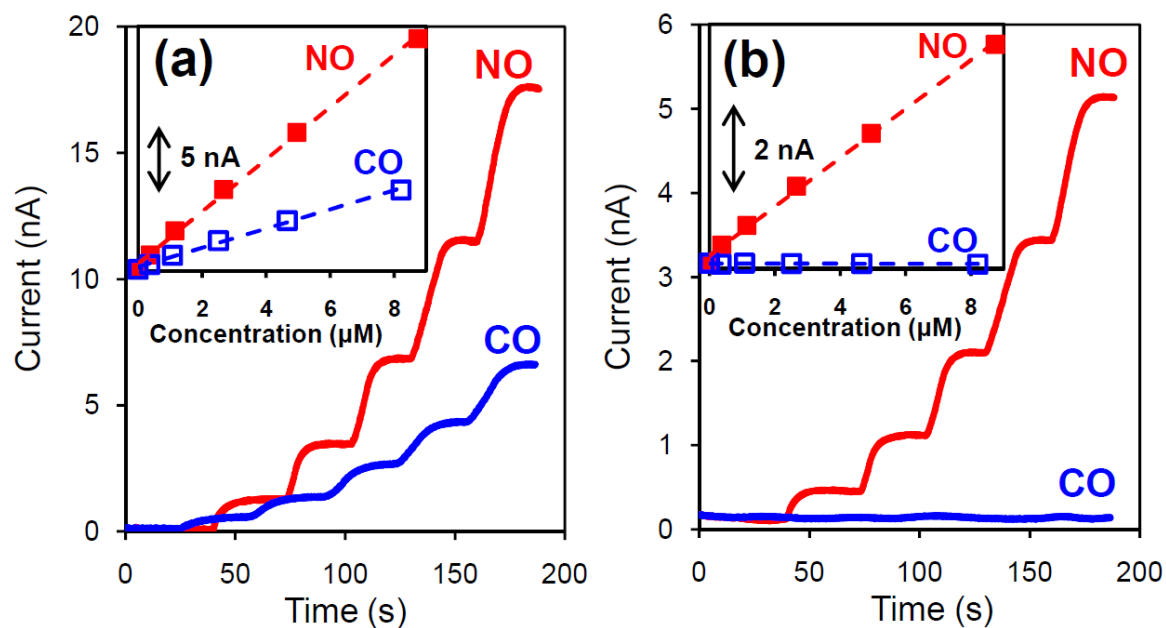

**Fig. S1.** Representative dynamic response curves of WE1 (a) and WE2 (b). 0.5, 1, 2, 3, 5  $\mu\text{L}$  of NO saturated stock solution (1.91 mM) and 1, 2, 4, 6, 10  $\mu\text{L}$  of CO saturated stock solution (0.90 mM) were added to deaerated PBS solution for NO, CO calibrations, respectively. Insets show corresponding calibration curves. Sensitivity: 2.13 nA  $\mu\text{M}^{-1}$  for NO and 0.79 nA  $\mu\text{M}^{-1}$  for CO at WE1, 0.60 nA  $\mu\text{M}^{-1}$  for NO at WE2.

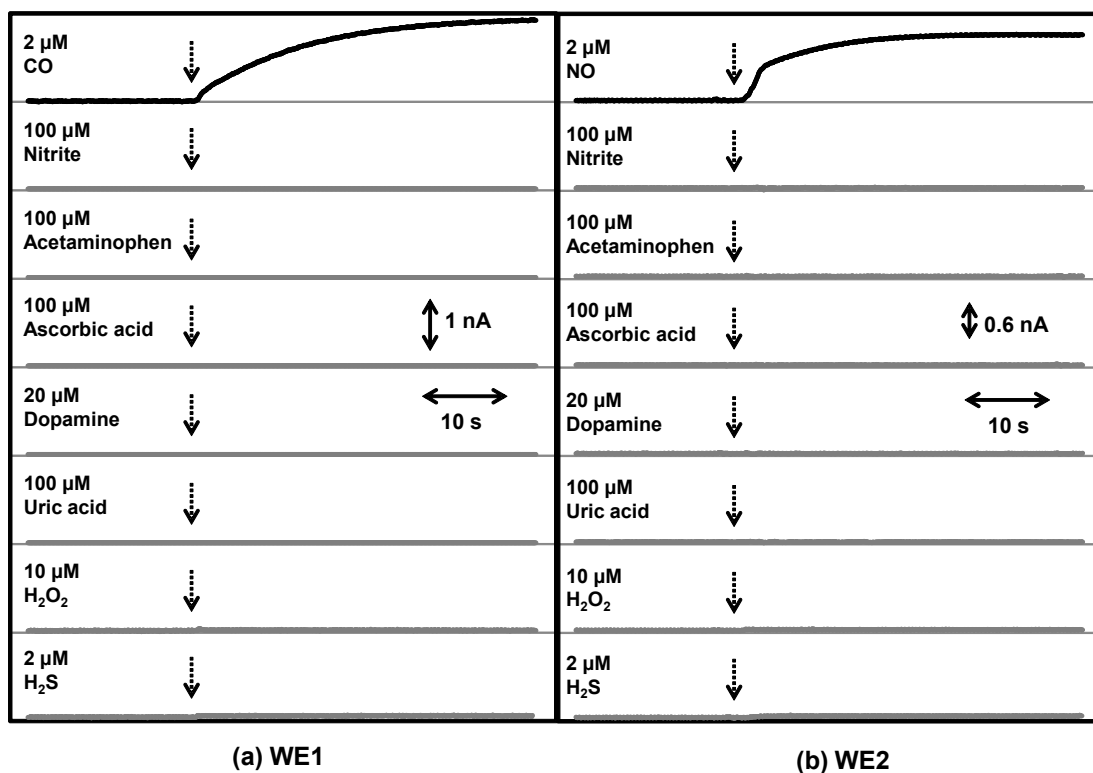

**Fig. S2.** Typical sensor current responses (left column, WE1; right column, WE2) to interfering species observed in deaerated PBS solution. Each arrow is marked with an injection of the interfering species.
